# Supplementary material for: ChAdOx1 nCoV-19 (AZD1222) vaccine-induced Fc receptor binding tracks with differential susceptibility to COVID-19
Source: PubMed Central journal article supplement (PMC10307634; doi:10.1038/s41590-023-01513-1), 2023-06-15
Supplement: 41590_2023_1513_MOESM1_ESM.pdf [file 41590_2023_1513_MOESM1_ESM.pdf]

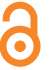

# **ChAdOx1 nCoV-19 (AZD1222) vaccine-induced Fc receptor binding tracks with differential susceptibility to COVID-19**

---

In the format provided by the authors and unedited

---

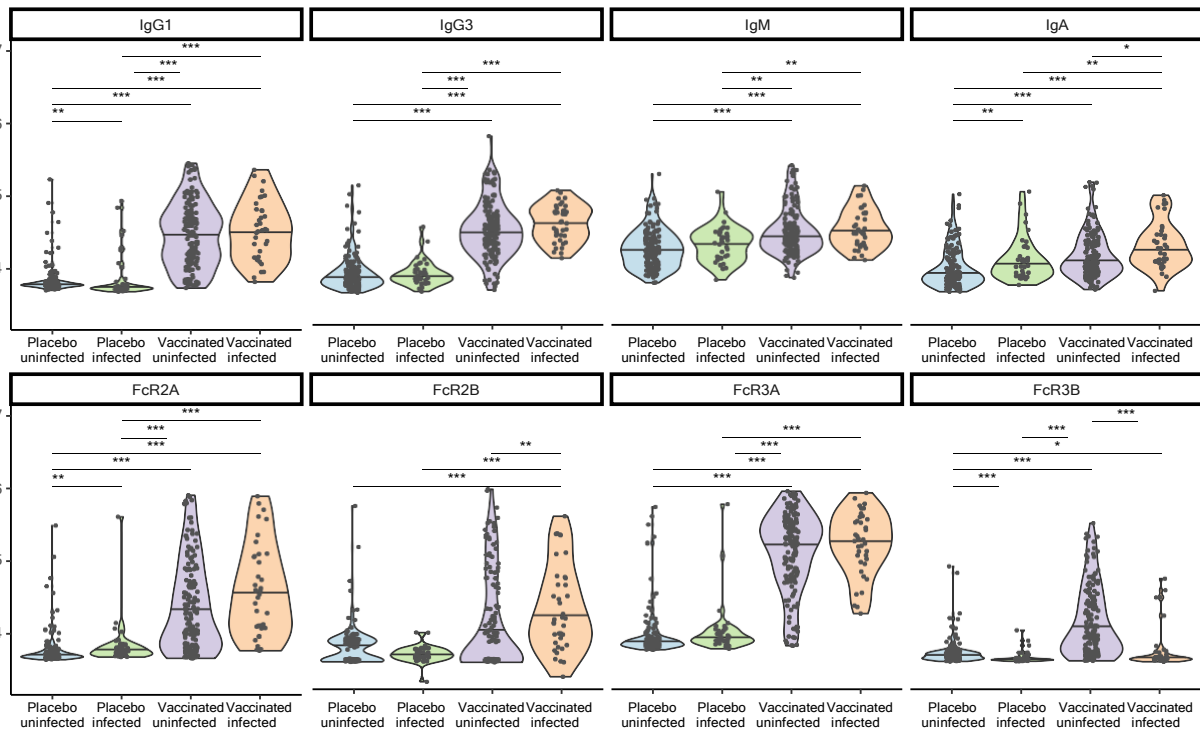

**Supplemental Figure 1. S-specific antibody response and Fc $\gamma$ -receptor binding profiles across ChAdOx1-nCoV-19 vaccinated and non-vaccinated groups.** The violin plots show the univariate comparisons of WT Spike-specific and Fc $\gamma$ -receptor binding profiles at peak immunogenicity (two weeks after the second injection) across ChAdOx1-nCoV-19 vaccinated and non-vaccinated (placebo) subjects that resisted COVID-19 (blue ( $n = 140$ ) and violet ( $n = 120$ )) or that developed COVID-19 (green ( $n = 30$ ) and orange ( $n = 24$ )) over the study period. A Mann-Whitney U-test was used to define statistical differences, and all values were corrected for multiple comparisons using the Benjamini-Hochberg (BH) method, with  $p < 0.001$  \*\*\*,  $p < 0.01$  \*\*,  $p < 0.05$ .

A)

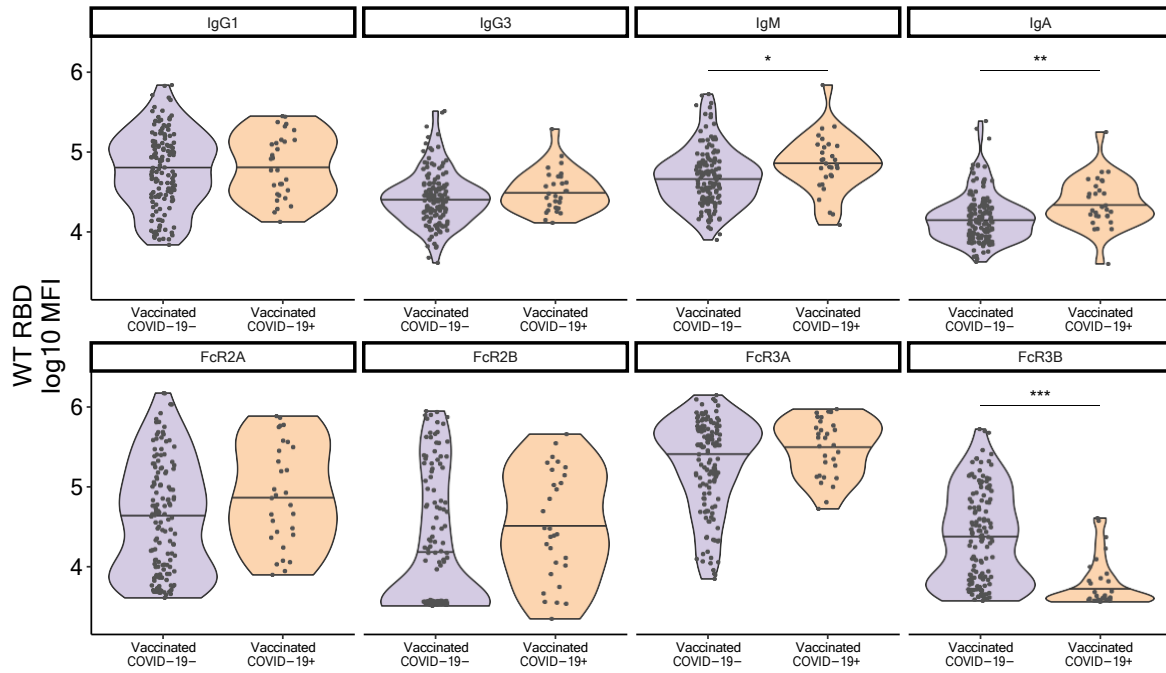

B)

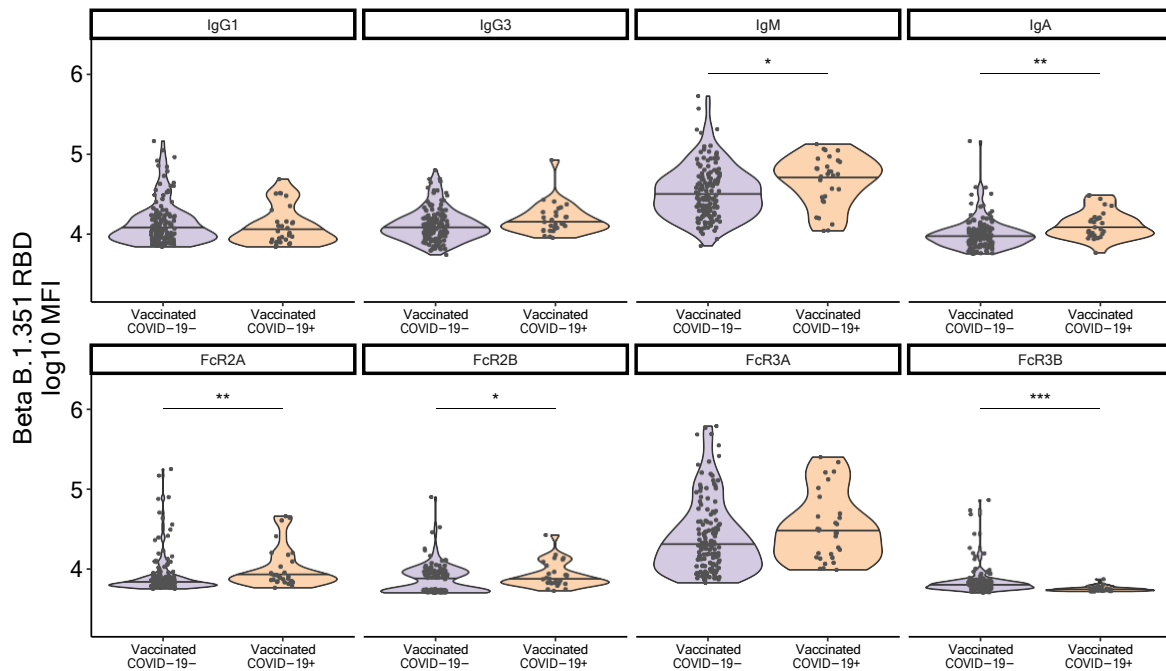

**Supplemental Figure 2. RBD-specific antibody Fc-profiles across groups.** The violin plots show the univariate comparisons of WT (A) and Beta (B) RBD-specific antibody titers and Fcγ-receptor binding profiles across ChAdOx1-nCoV-19 vaccinated subjects that resisted COVID-19 (violet,  $n = 140$ ) or that developed COVID-19 (orange,  $n = 30$ ) over the study period. A Mann-Whitney U-test was used to define statistical differences, and all values were corrected for multiple comparisons using the Benjamini-Hochberg (BH) method, with  $p < 0.001$  \*\*\*,  $p < 0.01$  \*\*,  $p < 0.05$  \*.

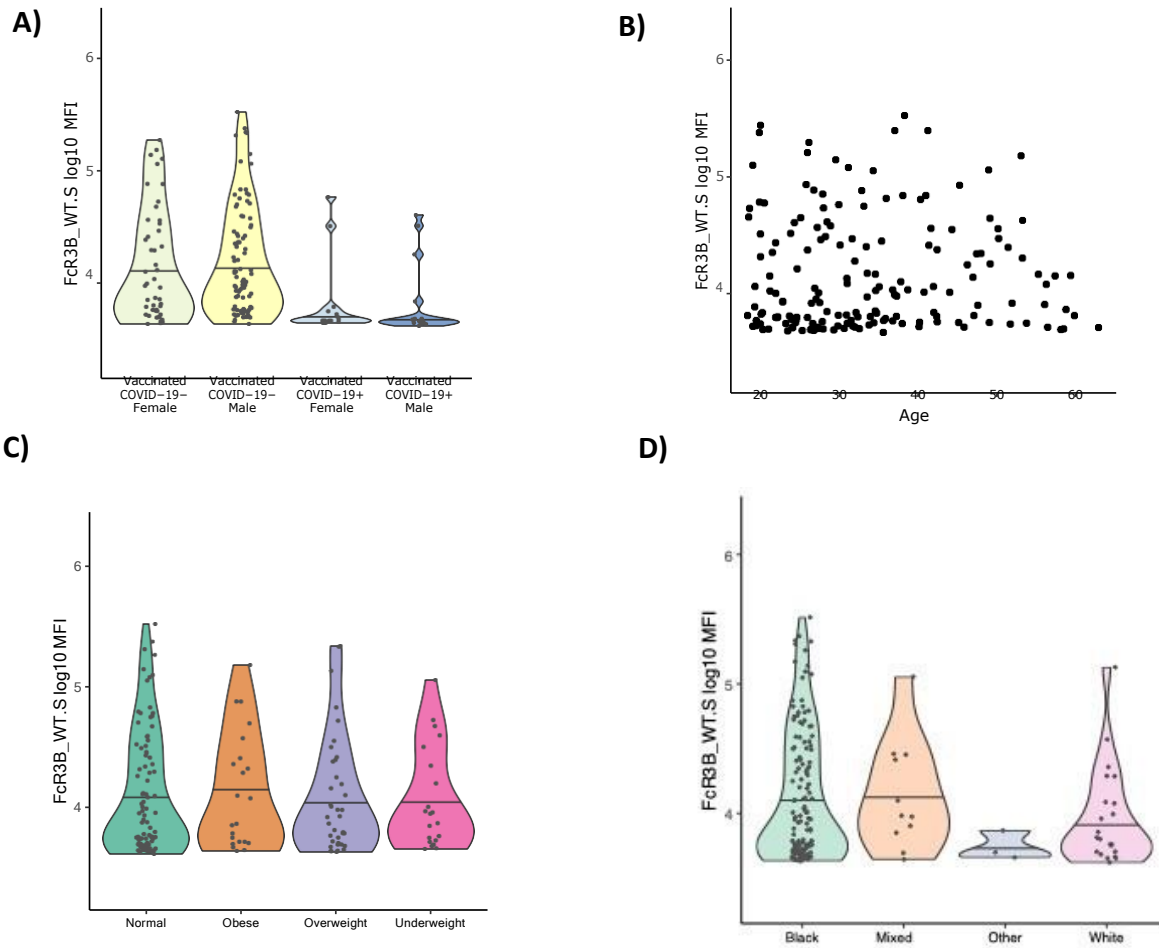

**Supplemental Figure 3. A linear model adjusted for demographic confounders.** Univariate graphs show Fc $\gamma$ R3B levels based on (A) sex (males ( $n = 108$ ) vs. females ( $n = 62$ )), (B) age (20 to 60 years old), (C) BMI categories (normal ( $n = 21$ ), obese ( $n = 22$ ), overweight ( $n = 38$ ), and underweight ( $n = 21$ )), and (D) race (black ( $n = 134$ ), mixed ( $n = 11$ ), others ( $n = 3$ ) and white ( $n = 22$ )).

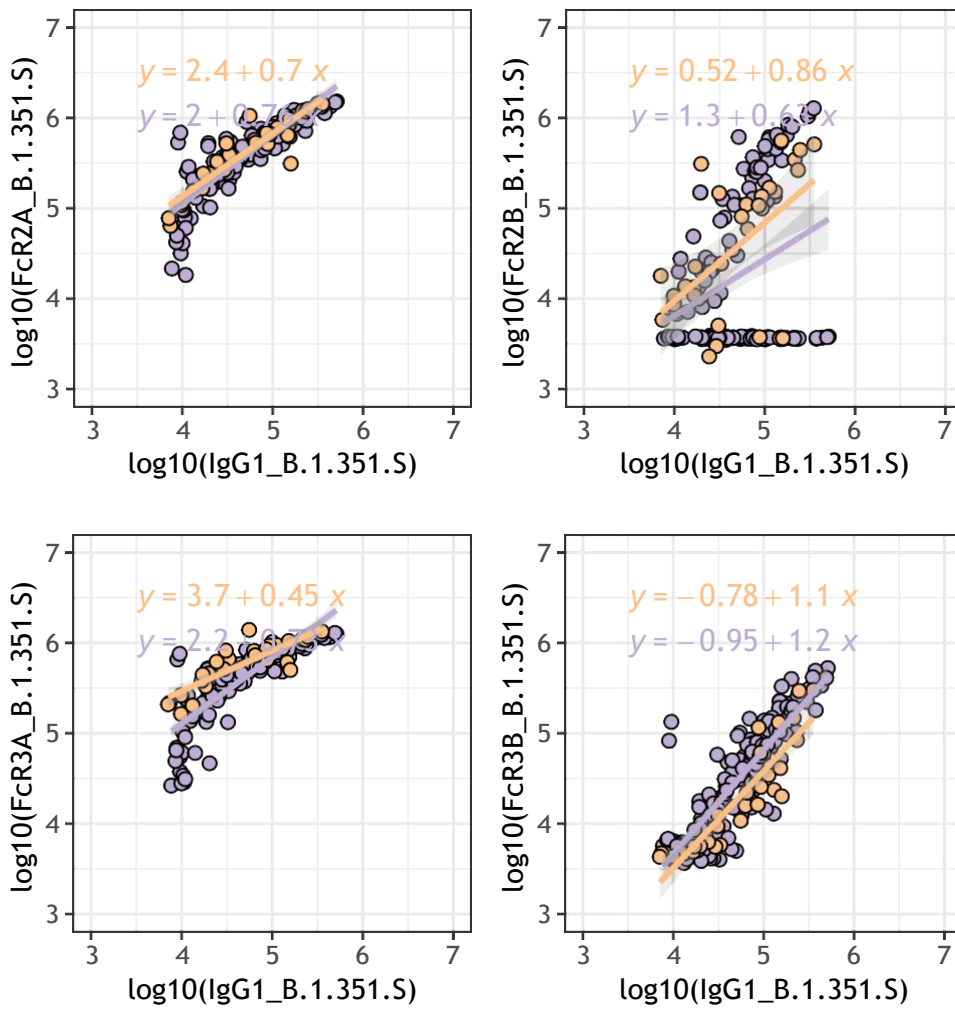

**Supplemental Figure 4. The relationship between IgG1 titers and FcγR binding levels (FcγR2A, FcγR2B, FcγR3A, and FcγR3B) in the vaccinees that resisted COVID-19 or developed disease.** Each dot represents single ChAdOx1-nCoV-19 vaccinated subjects that resisted COVID-19 (violet,  $n = 140$ ) or that developed COVID-19 (orange,  $n = 30$ ). The spearman correlations test was used to calculate the statistical significance.

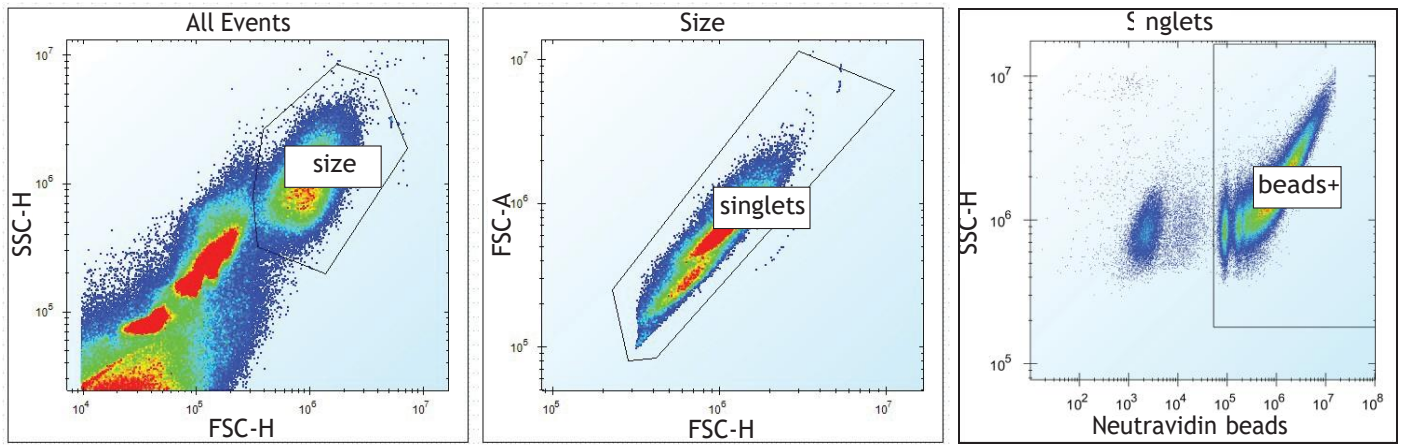

**Supplemental Figure 5. Gating strategy for Luminescence assay.** Gating strategy and interpretation for Luminescence assay. First, beads are defined by plotting side scatter height (SSC-H) versus forward scatter high (FSC-H). Doublet signals are excluded by plotting forward scatter area (FSC-A) versus forward scatter height (FSC-H). Positive beads are defined as positive for PE-conjugated and high side scatter (SSC-H).
